# Supplementary material for: Hybridized Zoonotic Schistosoma Infections Result in Hybridized Morbidity Profiles: A Clinical Morbidity Study amongst Co-Infected Human Populations of Senegal
Source: MDPI journal article supplement (doi:10.3390/microorganisms9081776), 2021-08-20
Supplement: s1 [file s1]

Supplementary Materials

Table S1. Hemoglobin levels (g/l) to diagnose anemia as recommended by the World Health Organization (WHO) [1].

| Age                       | Sex     | No anemia     | Anemia  |          |               |
|---------------------------|---------|---------------|---------|----------|---------------|
|                           |         |               | Mild    | Moderate | Severe        |
| 5-11 years of age         | Both    | 115 or higher | 110-114 | 80-109   | Lower than 80 |
| 12-14 years of age        | Both    | 120 or higher | 110-119 | 80-109   | Lower than 80 |
| 15 years of age and above | Females | 120 or higher | 110-119 | 80-109   | Lower than 80 |
|                           | Males   | 130 or higher | 110-129 | 80-109   | Lower than 80 |

Figure S1. Standard image patterns to score the picture of the liver and diagnose periportal fibrosis as recommended by the standardized WHO Niamey protocol [2,3].

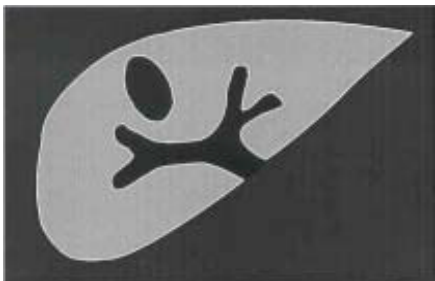

Image pattern A (normal)

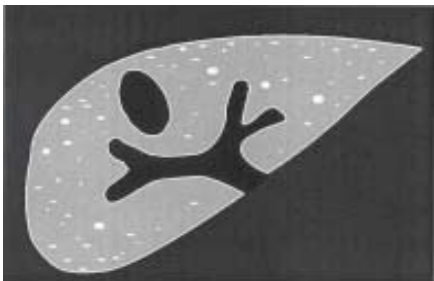

Image pattern B  
(peripheral portal branch echogenicity)

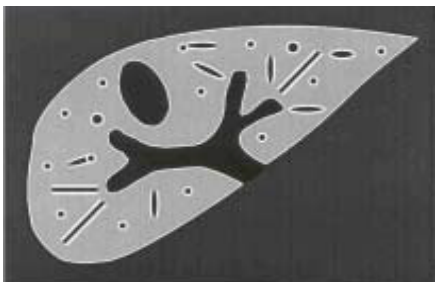

Image pattern C  
(peripheral periportal thickening)

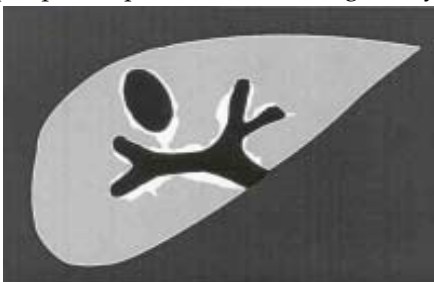

Image pattern D  
(central periportal thickening)

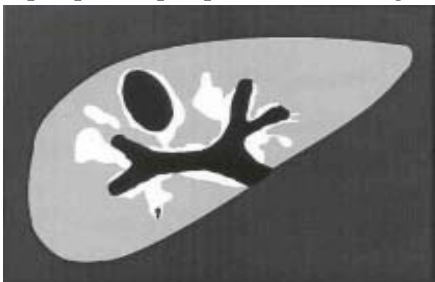

Image pattern E  
(central periportal thickening with echogenic patches expanding into the parenchyma)

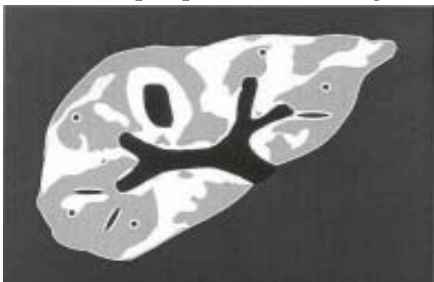

Image pattern F  
(very advanced central and peripheral periportal thickening)

### Additional Text S1. Cumulative link logistic regression models using R package ‘ordinal’.

The R package ‘ordinal’ was used to fit cumulative link logistic regression models [4], to estimate the effects of urogenital and intestinal infection intensities and their interaction on each morbidity indicator before treatment, adjusting for sex, age and study site (Barkedji or Richard Toll). For children, we accounted for potential clustering of morbidity indicators by defining school as a random effect. We used the logit link, with cumulative logits defined as [5]:

$$\text{logit}[P(Y_i \leq j|x_i)] = \log \frac{P(Y_i \leq j|x_i)}{1 - P(Y_i \leq j|x_i)} = \theta_j - x_i\beta - u_i \quad j = 1, \dots, J - 1 \quad (\text{Equation S1})$$

where  $Y_i$  is a random variable that can fall in  $j = 1, \dots, J$  categories (for example,  $j = +, ++$  or  $+++$  for hematuria),  $\theta_j$  represent the intercepts for each category,  $x_i$  is a vector of fixed effects covariates for the  $i^{\text{th}}$  individual and  $\beta$  is the corresponding set of regression coefficients. Parameter  $u$  is the random effects term for school, with  $u_i \sim \mathcal{N}(0, \sigma_u^2)$ . The cumulative logits are defined for all but the last category since for  $j = J$  the probability  $P(Y_i \leq j) = 1$  ( $Y_i$  is necessarily smaller or equal than  $J$ ).

The regression parameters can be expressed in terms of an odds ratio (OR). For a single dichotomous predictor variable (i.e.,  $X = 0$  or  $1$ )

$$\frac{P(Y \leq j|X = 1)}{1 - P(Y \leq j|X = 1)} = e^{\theta_j - \beta} \quad \text{if } X = 1 \quad (\text{Equation S2})$$

$$\frac{P(Y \leq j|X = 0)}{1 - P(Y \leq j|X = 0)} = e^{\theta_j} \quad \text{if } X = 0 \quad (\text{Equation S3})$$

The OR is then

$$\text{OR} = \frac{P(Y \leq j|X = 1)/1 - P(Y \leq j|X = 1)}{P(Y \leq j|X = 0)/1 - P(Y \leq j|X = 0)} = \frac{e^{\theta_j - \beta}}{e^{\theta_j}} = e^{-\beta} \quad (\text{Equation S4})$$

Similarly, the OR of the event  $Y \geq (j + 1)$  is  $e^{\beta}$ , which is the metric used in our study. An OR associated with category  $j$  or above being greater than 1 indicates that the odds of morbidity indicators being in category  $j$  or above would increase in individuals with variable  $X = 1$  compared to individuals with variable  $X = 0$ , and vice versa for an OR less than 1.

Note that in this model  $\beta$  is independent of  $j$ , meaning that  $\beta$  has the same effect for each of the categories. This is the “proportional odds” assumption. It is possible to test if this assumption is violated, and to use a partial-proportional odds model instead, where the coefficients  $\beta$  are allowed to vary with the category  $j$  for the explanatory variable(s) that violate the assumption [5],

$$\text{logit}[P(Y_i \leq j|x_i)] = \log \frac{P(Y_i \leq j|x_i)}{1 - P(Y_i \leq j|x_i)} = \theta_j - x_i\beta + w_i\bar{\beta}_j - u_i \quad j = 1, \dots, J - 1 \quad (\text{Equation S5})$$

Here,  $w_i$  is a vector of fixed effects covariates for the  $i^{\text{th}}$  observation and  $\bar{\beta}_j$  is the corresponding set of regression parameters which are allowed to depend on the response category  $j$ . In such a case, the OR of being in a category  $j$  or above will depend on  $j$  [5]. The proportional odds assumption for each explanatory variable was tested using likelihood ratio tests [5]. There was no evidence that the proportional odds assumption was violated for urogenital and intestinal schistosomiasis infection intensities (except for hematuria in children in 2016 but we were not able to fit a partial-proportional odds model) nor for the presence/absence of hybrids. However, the proportional odds assumption was sometimes violated for age, sex, and study site, in which case partial-proportional odds were fitted instead (see Tables S11 and S12).

Table S2. Characteristics of children ( $n=1,319$ ) and adults ( $n=300$ ) in two study sites of Senegal in 2016 and 2017 (complete dataset).

| Age group | Year | Site | <i>Sh</i> and <i>Sh-Sb</i> urogenital infection |                  |                  | <i>Sm</i> intestinal infection |                |                |                | Mean age | Proportion of females | Total examined <sup>1</sup> |
|-----------|------|------|-------------------------------------------------|------------------|------------------|--------------------------------|----------------|----------------|----------------|----------|-----------------------|-----------------------------|
|           |      |      | Prevalence                                      | Intensity        |                  | Prevalence                     | Intensity      |                |                |          |                       |                             |
|           |      |      |                                                 | Light            | Heavy            |                                | Light          | Moderate       | Heavy          |          |                       |                             |
| Children  | 2016 | BK   | 25%<br>(51/204)                                 | 19%<br>(38/204)  | 6%<br>(13/204)   | 0%<br>(0/206)                  | -              | -              | -              | 9.8      | 69%<br>(142/205)      | N=206                       |
|           |      | RT   | 70%<br>(264/378)                                | 43%<br>(162/378) | 27%<br>(102/378) | 14%<br>(45/318)                | 6%<br>(20/318) | 3%<br>(10/318) | 5%<br>(15/318) | 10.1     | 52%<br>(202/391)      | N=391                       |
|           | 2017 | BK   | 34%<br>(110/328)                                | 21%<br>(69/328)  | 13%<br>(41/328)  | 0%<br>(0/204)                  | -              | -              | -              | 10.0     | 56%<br>(183/328)      | N=328                       |
|           |      | RT   | 71%<br>(275/387)                                | 58%<br>(223/387) | 13%<br>(52/387)  | 13%<br>(37/290)                | 7%<br>(21/290) | 3%<br>(8/290)  | 3%<br>(8/290)  | 10.5     | 55%<br>(216/392)      | N=394                       |
| Adults    | 2016 | BK   | 18%<br>(19/104)                                 | 14%<br>(15/104)  | 4%<br>(4/104)    | 0%<br>(0/108)                  | -              | -              | -              | 40.2     | 59%<br>(64/108)       | N=108                       |
|           |      | RT   | 65%<br>(13/20)                                  | 60%<br>(12/20)   | 5%<br>(1/20)     | 0%<br>(0/20)                   | -              | -              | -              | 36.6     | 30%<br>(6/20)         | N=20                        |
|           | 2017 | BK   | 38%<br>(31/81)                                  | 36%<br>(29/81)   | 2%<br>(2/81)     | 0%<br>(0/58)                   | -              | -              | -              | 33.6     | 56%<br>(45/81)        | N=82                        |
|           |      | RT   | 33%<br>(29/87)                                  | 31%<br>(27/87)   | 2%<br>(2/87)     | 0%<br>(0/40)                   | -              | -              | -              | 33.8     | 47%<br>(42/90)        | N=90                        |

BK: Barkedji; RT: Richard Toll; *Sh*: *Schistosoma haematobium*; *Sh-Sb*: *S. haematobium*-*S. bovis* hybrids; *Sm*: *S. mansoni*

<sup>1</sup> The total includes individuals that received at least one of the parasitological or clinical examinations, as in Figure 1.

Table S3. Characteristics of children ( $n=378$ ) and adults ( $n=36$ ) with successful follow-up in two study sites of Senegal in 2016 and 2017.

| Age group | Year | Site | <i>Sh</i> and <i>Sh-Sb</i> urogenital infection |                  |                 | <i>Sm</i> intestinal infection |                |               |               | Mean age | Proportion of females | Total examined <sup>1</sup> |
|-----------|------|------|-------------------------------------------------|------------------|-----------------|--------------------------------|----------------|---------------|---------------|----------|-----------------------|-----------------------------|
|           |      |      | Prevalence                                      | Intensity        |                 | Prevalence                     | Intensity      |               |               |          |                       |                             |
|           |      |      |                                                 | Light            | Heavy           |                                | Light          | Moderate      | Heavy         |          |                       |                             |
| Children  | 2016 | BK   | 100%<br>(44/44)                                 | 73%<br>(32/44)   | 27%<br>(12/44)  | 0%<br>(0/44)                   | -              | -             | -             | 9.3      | 68%<br>(30/44)        | N=44                        |
|           |      | BK   | 94%<br>(68/72)                                  | 58%<br>(42/72)   | 36%<br>(26/72)  | 0%<br>(0/39)                   | -              | -             | -             | 9.6      | 51%<br>(37/72)        | N=72                        |
|           | 2017 | RT   | 95%<br>(246/259)                                | 76%<br>(196/259) | 19%<br>(50/259) | 17%<br>(34/196)                | 9%<br>(18/196) | 4%<br>(8/196) | 4%<br>(8/196) | 10.6     | 54%<br>(140/261)      | N=262                       |
| Adults    | 2016 | BK   | 82%<br>(14/17)                                  | 65%<br>(11/17)   | 17%<br>(3/17)   | 0%<br>(0/17)                   | -              | -             | -             | 34.7     | 71%<br>(12/17)        | N=17                        |
|           |      | BK   | 89%<br>(8/9)                                    | 89%<br>(8/9)     | 0%<br>(0/9)     | 0%<br>(0/7)                    | -              | -             | -             | 28.1     | 78%<br>(7/9)          | N=9                         |
|           | 2017 | RT   | 89%<br>(8/9)                                    | 89%<br>(8/9)     | 0%<br>(0/9)     | 0%<br>(0/7)                    | -              | -             | -             | 29.9     | 60%<br>(6/10)         | N=10                        |

BK: Barkedji; RT: Richard Toll; *Sh*: *Schistosoma haematobium*; *Sh-Sb*: *S. haematobium*-*S. bovis* hybrids; *Sm*: *S. mansoni*

<sup>1</sup> The total includes individuals with successful follow-up that received at least one of the parasitological or clinical examinations both pre- and post-treatment, as in Figure 1.

Table S4. Characteristics of children ( $n=426$ ) and adults ( $n=46$ ) with genotyped miracidia in two study sites of Senegal in 2016 and 2017.

| Age group | Year | Site | Proportion of individuals with <i>Sh-Sb</i> miracidia | <i>Sh</i> and <i>Sh-Sb</i> urogenital infection |                  |                 | <i>Sm</i> intestinal infection |                 |               |               | Mean age | Proportion of females | Total examined <sup>1</sup> |
|-----------|------|------|-------------------------------------------------------|-------------------------------------------------|------------------|-----------------|--------------------------------|-----------------|---------------|---------------|----------|-----------------------|-----------------------------|
|           |      |      |                                                       | Prevalence                                      | Intensity        |                 | Prevalence                     | Intensity       |               |               |          |                       |                             |
|           |      |      |                                                       |                                                 | Light            | Heavy           |                                | Light           | Moderate      | Heavy         |          |                       |                             |
| Children  | 2016 | BK   | 11%<br>(4/35)                                         | 100%<br>(35/35)                                 | 63%<br>(22/35)   | 37%<br>(13/35)  | 0%<br>(0/35)                   | -               | -             | -             | 9.8      | 66%<br>(23/35)        | N=35                        |
|           |      | RT   | 63%<br>(106/168)                                      | 98%<br>(165/168)                                | 45%<br>(76/168)  | 53%<br>(89/168) | 19%<br>(27/141)                | 10%<br>(14/141) | 3%<br>(5/141) | 6%<br>(8/141) | 9.9      | 51%<br>(85/168)       | N=168                       |
|           | 2017 | BK   | 11%<br>(6/54)                                         | 96%<br>(52/54)                                  | 46%<br>(25/54)   | 50%<br>(27/54)  | 0%<br>(0/33)                   | -               | -             | -             | 9.9      | 39%<br>(21/54)        | N=54                        |
|           |      | RT   | 72%<br>(121/169)                                      | 92%<br>(155/168)                                | 66%<br>(111/168) | 26%<br>(44/168) | 17%<br>(21/121)                | 11%<br>(13/121) | 4%<br>(5/121) | 2%<br>(3/121) | 10.6     | 54%<br>(90/168)       | N=169                       |
| Adults    | 2016 | BK   | 23%<br>(3/13)                                         | 77%<br>(10/13)                                  | 46%<br>(6/13)    | 31%<br>(4/13)   | 0%<br>(0/13)                   | -               | -             | -             | 33.8     | 69%<br>(9/13)         | N=13                        |
|           |      | RT   | 50%<br>(2/4)                                          | 100%<br>(4/4)                                   | 100%<br>(4/4)    | 0%<br>(0/4)     | 0%<br>(0/4)                    | -               | -             | -             | 35.3     | 50%<br>(2/4)          | N=4                         |
|           | 2017 | BK   | 0%<br>(0/16)                                          | 81%<br>(13/16)                                  | 75%<br>(12/16)   | 6%<br>(1/16)    | 0%<br>(0/10)                   | -               | -             | -             | 26.1     | 50%<br>(8/16)         | N=16                        |
|           |      | RT   | 100%<br>(13/13)                                       | 73%<br>(8/11)                                   | 73%<br>(8/11)    | 0%<br>(0/11)    | 0%<br>(0/3)                    | -               | -             | -             | 33.7     | 73%<br>(8/11)         | N=13                        |

BK: Barkedji; RT: Richard Toll; *Sh*: *Schistosoma haematobium*; *Sh-Sb*: *S. haematobium*-*S. bovis* hybrids; *Sm*: *S. mansoni*

<sup>1</sup> The total includes individuals with genotyped miracidia and that received at least one of the parasitological or clinical examinations. Therefore, it is a subset of the complete dataset presented in Table S2.

Table S5. Characteristics of children ( $n=210$ ) and adults ( $n=16$ ) with genotyped miracidia and successful follow-up in two study sites of Senegal in 2016 and 2017.

| Age group | Year | Site | Proportion of individuals with <i>Sh-Sb</i> miracidia | <i>Sh</i> and <i>Sh-Sb</i> urogenital infection |                  |                 | <i>Sm</i> intestinal infection |                 |               |               | Mean age | Proportion of females | Total examined <sup>1</sup> |
|-----------|------|------|-------------------------------------------------------|-------------------------------------------------|------------------|-----------------|--------------------------------|-----------------|---------------|---------------|----------|-----------------------|-----------------------------|
|           |      |      |                                                       | Prevalence                                      | Intensity        |                 | Prevalence                     | Intensity       |               |               |          |                       |                             |
|           |      |      |                                                       |                                                 | Light            | Heavy           |                                | Light           | Moderate      | Heavy         |          |                       |                             |
| Children  | 2016 | BK   | 13%<br>(4/31)                                         | 100%<br>(31/31)                                 | 61%<br>(19/31)   | 39%<br>(12/31)  | 0%<br>(0/31)                   | -               | -             | -             | 9.4      | 68%<br>(21/31)        | N=31                        |
|           | 2017 | BK   | 15%<br>(5/34)                                         | 100%<br>(34/34)                                 | 47%<br>(16/34)   | 53%<br>(18/34)  | 0%<br>(0/22)                   | -               | -             | -             | 9.9      | 44%<br>(15/34)        | N=34                        |
|           |      | RT   | 70%<br>(102/145)                                      | 98%<br>(142/145)                                | 69%<br>(100/145) | 29%<br>(42/145) | 18%<br>(19/104)                | 10%<br>(11/104) | 5%<br>(5/104) | 3%<br>(3/104) | 10.7     | 53%<br>(77/144)       | N=145                       |
| Adults    | 2016 | BK   | 27%<br>(3/11)                                         | 82%<br>(9/11)                                   | 55%<br>(6/11)    | 27%<br>(3/11)   | 0%<br>(0/11)                   | -               | -             | -             | 35.1     | 73%<br>(8/11)         | N=11                        |
|           | 2017 | BK   | 0%<br>(0/3)                                           | 100%<br>(3/3)                                   | 100%<br>(3/3)    | 0%<br>(0/3)     | 0%<br>(0/2)                    | -               | -             | -             | 26.3     | 100%<br>(3/3)         | N=3                         |
|           |      | RT   | 100%<br>(2/2)                                         | 100%<br>(2/2)                                   | 100%<br>(2/2)    | 0%<br>(0/2)     | 0%<br>(0/1)                    | -               | -             | -             | 37.5     | 100%<br>(2/2)         | N=2                         |

BK: Barkedji; RT: Richard Toll; *Sh*: *Schistosoma haematobium*; *Sh-Sb*: *S. haematobium*-*S. bovis* hybrids; *Sm*: *S. mansoni*

<sup>1</sup> The total includes individuals with genotyped miracidia and successful follow-up that received at least one of the parasitological or clinical examinations both pre- and post-treatment. Therefore, it is a subset of the dataset presented in Table S3.

Table S6. Prevalence of lower and upper urinary tract lesions assessed by ultrasound among children and adults in two study sites of Senegal in 2017 (number of individuals examined indicated in parentheses).

|          |          | Urinary bladder lesions |                |               |               | Dilatation of the ureter |               | Dilatation of the kidney |
|----------|----------|-------------------------|----------------|---------------|---------------|--------------------------|---------------|--------------------------|
|          |          | Irregularity            | Thickening     | Mass          | Pseudopolyp   | Unilateral               | Bilateral     |                          |
| Children | Barkedji | 6%<br>(n=303)           | 12%<br>(n=303) | 5%<br>(n=303) | 0%<br>(n=303) | 2%<br>(n=297)            | 2%<br>(n=297) | 1%<br>(n=297)            |
|          | Richard  | 27%<br>(n=335)          | 26%<br>(n=335) | 8%<br>(n=335) | 1%<br>(n=335) | 6%<br>(n=335)            | 7%<br>(n=335) | 3%<br>(n=335)            |
|          | Toll     |                         |                |               |               |                          |               |                          |
| Adults   | Barkedji | 16%<br>(n=19)           | 5%<br>(n=19)   | 11%<br>(n=19) | 0%<br>(n=19)  | 0%<br>(n=19)             | 0%<br>(n=19)  | 0%<br>(n=19)             |
|          | Richard  | 24%<br>(n=41)           | 17%<br>(n=41)  | 0%<br>(n=41)  | 0%<br>(n=41)  | 0%<br>(n=41)             | 2%<br>(n=41)  | 0%<br>(n=41)             |
|          | Toll     |                         |                |               |               |                          |               |                          |

Figure S2. Example of ultrasound images of bladder lesions (credit: C. B. Fall).

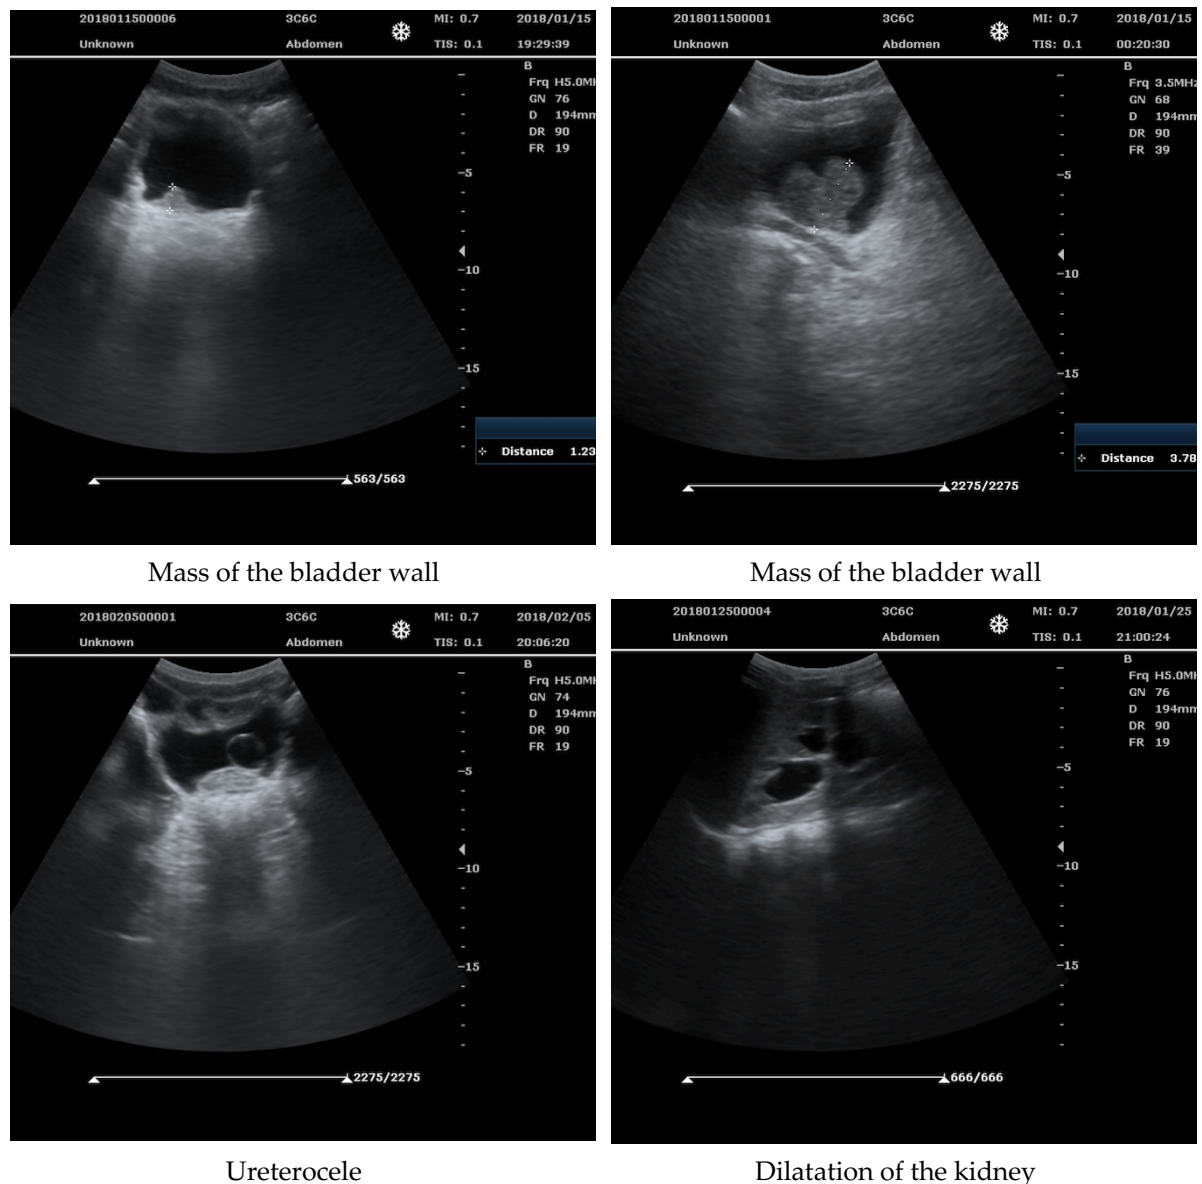

Table S7. Odds ratios [95% confidence intervals] and *p*-values (in parentheses) of anemia in 2016 and 2017 and hepatomegaly being in category *j* or above among children in Senegal, depending on schistosomiasis infection intensity and adjusted for age, sex, and study site. Only individuals with complete data on anemia or hepatomegaly, urogenital or intestinal infection intensities, age, sex, and study site were included in the cumulative link logistic regression models (for anemia *n*=453 in 2016 and *n*=269 in 2017; for hepatomegaly *n*=137).

|                                          |          | ANEMIA 2016 ( <i>j</i> = mild, moderate, or severe)       |                                          |                                            |
|------------------------------------------|----------|-----------------------------------------------------------|------------------------------------------|--------------------------------------------|
|                                          |          | <i>Sh</i> and <i>Sh-Sb</i> urogenital infection intensity |                                          |                                            |
|                                          |          | None                                                      | Light                                    | Heavy                                      |
| <i>Sm</i> intestinal infection intensity | None     | 1                                                         | 1.15 [0.89 – 1.49]<br>( <i>p</i> =0.29)  | 1.32 [0.79 – 2.21]<br>( <i>p</i> =0.29)    |
|                                          | Light    | 1.47 [0.82 – 2.64]<br>( <i>p</i> =0.20)                   | 1.37 [0.93 – 2.02]<br>( <i>p</i> =0.11)  | 1.28 [0.67 – 2.43]<br>( <i>p</i> =0.45)    |
|                                          | Moderate | 2.16 [0.67 – 6.96]<br>( <i>p</i> =0.20)                   | 1.64 [0.87 – 3.08]<br>( <i>p</i> =0.12)  | 1.24 [0.43 – 3.57]<br>( <i>p</i> =0.69)    |
|                                          | Heavy    | 3.18 [0.55 – 18.4]<br>( <i>p</i> =0.20)                   | 1.96 [0.79 – 4.83]<br>( <i>p</i> =0.15)  | 1.20 [0.26 – 5.61]<br>( <i>p</i> =0.81)    |
|                                          |          | ANEMIA 2017 ( <i>j</i> = mild, moderate, or severe)       |                                          |                                            |
|                                          |          | <i>Sh</i> and <i>Sh-Sb</i> urogenital infection intensity |                                          |                                            |
|                                          |          | None                                                      | Light                                    | Heavy                                      |
| <i>Sm</i> intestinal infection intensity | None     | 1                                                         | 0.80 [0.52 – 1.23]<br>( <i>p</i> =0.31)  | 0.64 [0.27 – 1.51]<br>( <i>p</i> =0.31)    |
|                                          | Light    | 0.60 [0.20 – 1.75]<br>( <i>p</i> =0.35)                   | 0.87 [0.48 – 1.57]<br>( <i>p</i> =0.64)  | 1.27 [0.47 – 3.39]<br>( <i>p</i> =0.64)    |
|                                          | Moderate | 0.35 [0.04 – 3.05]<br>( <i>p</i> =0.35)                   | 0.94 [0.36 – 2.46]<br>( <i>p</i> =0.90)  | 2.49 [0.50 – 12.3]<br>( <i>p</i> =0.26)    |
|                                          | Heavy    | 0.21 [0.01 – 5.34]<br>( <i>p</i> =0.35)                   | 1.02 [0.26 – 4.04]<br>( <i>p</i> =0.98)  | 4.91 [0.47 – 51.2]<br>( <i>p</i> =0.18)    |
|                                          |          | HEPATOMEGALY ( <i>j</i> = moderate or severe)             |                                          |                                            |
|                                          |          | <i>Sh</i> and <i>Sh-Sb</i> urogenital infection intensity |                                          |                                            |
|                                          |          | None                                                      | Light                                    | Heavy                                      |
| <i>Sm</i> intestinal infection intensity | None     | 1                                                         | 0.93 [0.52 – 1.66]<br>( <i>p</i> =0.81)  | 0.87 [0.28 – 2.74]<br>( <i>p</i> =0.81)    |
|                                          | Light    | 0.26 [0.02 – 4.50]<br>( <i>p</i> =0.36)                   | 0.53 [0.17 – 1.65]<br>( <i>p</i> =0.27)  | 1.07 [0.07 – 17.5]<br>( <i>p</i> =0.96)    |
|                                          | Heavy    | 0.02 [0.000004 – 91.0]<br>( <i>p</i> =0.36)               | 0.17 [0.008 – 3.69]<br>( <i>p</i> =0.26) | 1.61 [0.0004 – 5,989]<br>( <i>p</i> =0.91) |

*Sh*: *Schistosoma haematobium*; *Sh-Sb*: *S. haematobium*-*S. bovis* hybrids; *Sm*: *S. mansoni*



**Table S8. Odds ratio [95% confidence intervals] and *p*-values (in parentheses) of various morbidity indicators being in category *j* or above among adults in Senegal in 2016 and 2017, depending on urogenital schistosomiasis infection intensity and adjusted for age, sex, and study site.**

| Morbidity indicator                                    | <i>n</i> <sup>1</sup> | <i>Sh</i> and <i>Sh-Sb</i> urogenital infection intensity |                                            |
|--------------------------------------------------------|-----------------------|-----------------------------------------------------------|--------------------------------------------|
|                                                        |                       | Light                                                     | Heavy                                      |
| Hematuria 2016<br>( <i>j</i> = +, ++ or +++)           | 122                   | 7.60 [3.42 – 18.4]<br>( <i>p</i> <0.0001)                 | 57.7 [11.8 – 340]<br>( <i>p</i> <0.0001)   |
| Hematuria 2017<br>( <i>j</i> = +, ++ or +++)           | 157                   | 4.22 [2.21 – 8.06]<br>( <i>p</i> <0.0001)                 | 17.8 [4.90 – 65.0]<br>( <i>p</i> <0.0001)  |
| Anemia 2016<br>( <i>j</i> = mild, moderate, or severe) | 42                    | 1.21 [0.40 – 3.51]<br>( <i>p</i> =0.72)                   | 1.48 [0.16 – 12.3]<br>( <i>p</i> =0.72)    |
| Anemia 2017<br>( <i>j</i> = mild, moderate, or severe) | 41                    | 1.89 [0.39 – 9.46]<br>( <i>p</i> =0.43)                   | 3.57 [0.15 – 89.6]<br>( <i>p</i> =0.43)    |
| Global score <sup>2</sup><br>( <i>j</i> = positive)    | 58                    | 4.48 [1.52 – 14.6]<br>( <i>p</i> =0.0085)                 | 20.1 [2.30 – 213]<br>( <i>p</i> =0.0085)   |
| Bladder wall calcification<br>( <i>j</i> = present)    | 39                    | 17.0 [2.70 – 208]<br>( <i>p</i> =0.0084)                  | 288 [7.31 – 43,451]<br>( <i>p</i> =0.0084) |

*Sh*: *Schistosoma haematobium*; *Sh-Sb*: *S. haematobium*-*S. bovis* hybrids

<sup>1</sup> Only individuals with complete data on each morbidity indicator, urogenital or intestinal infection intensities, age, sex, and study site were included in the cumulative link logistic regression models.

<sup>2</sup> The global score is the sum of the bladder and the upper tract intermediate scores.

Table S9. Odds ratio [95% confidence intervals] and *p*-values (in parentheses) of urinary bladder lesions as assessed by ultrasound among children in Senegal in 2017, depending on schistosomiasis infection intensity and adjusted for age, sex, and study site. Only individuals with complete data on urinary bladder lesions, urogenital or intestinal infection intensities, age, sex, and study site were included in the cumulative link logistic regression models (*n*=424).

|                                                 |          | IRREGULARITY                                              |                                           |                                            |
|-------------------------------------------------|----------|-----------------------------------------------------------|-------------------------------------------|--------------------------------------------|
|                                                 |          | <i>Sh</i> and <i>Sh-Sb</i> urogenital infection intensity |                                           |                                            |
|                                                 |          | None                                                      | Light                                     | Heavy                                      |
| <b><i>Sm</i> intestinal infection intensity</b> | None     | 1                                                         | 2.20 [1.39 – 3.48]<br>( <i>p</i> =0.0074) | 4.84 [1.94 – 12.1]<br>( <i>p</i> =0.0074)  |
|                                                 | Light    | 2.44 [0.60 – 9.92]<br>( <i>p</i> =0.21)                   | 1.93 [0.98 – 3.79]<br>( <i>p</i> =0.060)  | 1.53 [0.35 – 6.65]<br>( <i>p</i> =0.57)    |
|                                                 | Moderate | 5.96 [0.36 – 98.5]<br>( <i>p</i> =0.21)                   | 1.70 [0.55 – 5.18]<br>( <i>p</i> =0.35)   | 0.48 [0.03 – 7.12]<br>( <i>p</i> =0.60)    |
|                                                 | Heavy    | 14.5 [0.22 – 977]<br>( <i>p</i> =0.21)                    | 1.49 [0.30 – 7.44]<br>( <i>p</i> =0.63)   | 0.15 [0.003 – 8.41]<br>( <i>p</i> =0.36)   |
|                                                 |          | THICKENING                                                |                                           |                                            |
|                                                 |          | <i>Sh</i> and <i>Sh-Sb</i> urogenital infection intensity |                                           |                                            |
|                                                 |          | None                                                      | Light                                     | Heavy                                      |
| <b><i>Sm</i> intestinal infection intensity</b> | None     | 1                                                         | 2.62 [1.72 – 4.01]<br>( <i>p</i> <0.0001) | 6.88 [2.95 – 16.1]<br>( <i>p</i> <0.0001)  |
|                                                 | Light    | 1.00 [0.28 – 3.55]<br>( <i>p</i> =0.99)                   | 2.84 [1.39 – 5.81]<br>( <i>p</i> =0.0042) | 8.09 [2.78 – 23.6]<br>( <i>p</i> =0.00012) |
|                                                 | Moderate | 1.00 [0.08 – 12.6]<br>( <i>p</i> =0.99)                   | 3.08 [0.95 – 10.0]<br>( <i>p</i> =0.061)  | 9.52 [1.62 – 55.9]<br>( <i>p</i> =0.013)   |
|                                                 | Heavy    | 1.00 [0.02 – 44.7]<br>( <i>p</i> =0.99)                   | 3.34 [0.63 – 17.8]<br>( <i>p</i> =0.16)   | 11.2 [0.84 – 149]<br>( <i>p</i> =0.067)    |
|                                                 |          | MASS                                                      |                                           |                                            |
|                                                 |          | <i>Sh</i> and <i>Sh-Sb</i> urogenital infection intensity |                                           |                                            |
|                                                 |          | None                                                      | Light                                     | Heavy                                      |
| <b><i>Sm</i> intestinal infection intensity</b> | None     | 1                                                         | 5.54 [2.56 – 12.0]<br>( <i>p</i> <0.0001) | 30.7 [6.54 – 144]<br>( <i>p</i> <0.0001)   |
|                                                 | Light    | 2.18 [0.45 – 10.5]<br>( <i>p</i> =0.33)                   | 10.6 [3.52 – 32.0]<br>( <i>p</i> <0.0001) | 51.6 [10.2 – 262]<br>( <i>p</i> <0.0001)   |
|                                                 | Moderate | 4.75 [0.21 – 110]<br>( <i>p</i> =0.33)                    | 20.3 [3.89 – 106]<br>( <i>p</i> =0.00035) | 86.8 [8.94 – 844]<br>( <i>p</i> =0.00012)  |
|                                                 | Heavy    | 10.4 [0.09 – 1150]<br>( <i>p</i> =0.33)                   | 38.9 [4.05 – 374]<br>( <i>p</i> =0.0015)  | 146 [6.20 – 3,441]<br>( <i>p</i> =0.0020)  |

*Sh*: *Schistosoma haematobium*; *Sh-Sb*: *S. haematobium*-*S. bovis* hybrids; *Sm*: *S. mansoni*

Table S10. Odds ratio [95% confidence intervals] and *p*-values (in parentheses) of upper urinary tract lesions being in category *j* or above as assessed by ultrasound among children in Senegal in 2017, depending on schistosomiasis infection intensity and adjusted for age, sex, and study site. Only individuals with complete data on upper urinary tract lesions, urogenital or intestinal infection intensities, age, sex, and study site were included in the cumulative link logistic regression models (*n*=419).

|                                                 |          | DILATATION OF THE URETER ( <i>j</i> = unilateral or bilateral) |                                           |                                            |
|-------------------------------------------------|----------|----------------------------------------------------------------|-------------------------------------------|--------------------------------------------|
|                                                 |          | <i>Sh</i> and <i>Sh-Sb</i> urogenital infection intensity      |                                           |                                            |
|                                                 |          | None                                                           | Light                                     | Heavy                                      |
| <b><i>Sm</i> intestinal infection intensity</b> | None     | 1                                                              | 2.12 [1.23 – 3.64]<br>( <i>p</i> =0.0068) | 4.47 [1.51 – 13.2]<br>( <i>p</i> =0.0068)  |
|                                                 | Light    | 0.80 [0.15 – 4.11]<br>( <i>p</i> =0.79)                        | 1.81 [0.76 – 4.32]<br>( <i>p</i> =0.18)   | 4.10 [1.07 – 15.7]<br>( <i>p</i> =0.040)   |
|                                                 | Moderate | 0.64 [0.02 – 16.9]<br>( <i>p</i> =0.79)                        | 1.54 [0.35 – 6.70]<br>( <i>p</i> =0.56)   | 3.75 [0.40 – 35.4]<br>( <i>p</i> =0.25)    |
|                                                 | Heavy    | 0.51 [0.004 – 69.5]<br>( <i>p</i> =0.79)                       | 1.32 [0.16 – 10.9]<br>( <i>p</i> =0.80)   | 3.43 [0.13 – 92.6]<br>( <i>p</i> =0.46)    |
|                                                 |          | DILATATION OF THE KIDNEY ( <i>j</i> = present)                 |                                           |                                            |
|                                                 |          | <i>Sh</i> and <i>Sh-Sb</i> urogenital infection intensity      |                                           |                                            |
|                                                 |          | None                                                           | Light                                     | Heavy                                      |
| <b><i>Sm</i> intestinal infection intensity</b> | None     | 1                                                              | 0.95 [0.34 – 2.67]<br>( <i>p</i> =0.92)   | 0.90 [0.11 – 7.14]<br>( <i>p</i> =0.92)    |
|                                                 | Light    | 1.61 [0.14 – 19.0]<br>( <i>p</i> =0.71)                        | 1.14 [0.28 – 4.67]<br>( <i>p</i> =0.86)   | 0.81 [0.05 – 14.4]<br>( <i>p</i> =0.89)    |
|                                                 | Moderate | 2.58 [0.02 – 360]<br>( <i>p</i> =0.71)                         | 1.37 [0.15 – 12.6]<br>( <i>p</i> =0.78)   | 0.73 [0.005 – 115]<br>( <i>p</i> =0.90)    |
|                                                 | Heavy    | 4.15 [0.003 – 6839]<br>( <i>p</i> =0.71)                       | 1.65 [0.07 – 38.1]<br>( <i>p</i> =0.75)   | 0.66 [0.0004 – 1,186]<br>( <i>p</i> =0.91) |

*Sh*: *Schistosoma haematobium*; *Sh-Sb*: *S. haematobium*-*S. bovis* hybrids; *Sm*: *S. mansoni*

**Table S11. Odds ratio [95% confidence intervals] and *p*-values (in parentheses) of various morbidity indicators being in category *j* or above among children in Senegal in 2016 and 2017, depending on age, sex, and study site.**

| Morbidity indicator               | <i>n</i> <sup>1</sup> | <i>j</i>                    | Study site<br>(OR RT <i>vs</i> BK)         | Sex<br>(OR Boys <i>vs</i> Girls)          | Age<br>(OR per year)                      |
|-----------------------------------|-----------------------|-----------------------------|--------------------------------------------|-------------------------------------------|-------------------------------------------|
| Hematuria<br>2016                 | 509                   | +                           |                                            | 1.19 [0.75 – 1.88]<br>( <i>p</i> =0.47)   |                                           |
|                                   |                       | ++                          | 1.17 [0.52 – 2.60]<br>( <i>p</i> =0.70)    | 1.54 [0.93 – 2.55]<br>( <i>p</i> =0.092)  | 0.92 [0.84– 1.01]<br>( <i>p</i> =0.076)   |
|                                   |                       | +++                         |                                            | 1.03 [0.61 – 1.74]<br>( <i>p</i> =0.92)   |                                           |
| Hematuria<br>2017                 | 472                   | +                           | 7.27 [3.08 – 17.1]<br>( <i>p</i> <0.0001)  |                                           |                                           |
|                                   |                       | ++                          | 3.59 [1.52 – 8.49]<br>( <i>p</i> =0.0036)  | 1.37 [0.90 – 2.09]<br>( <i>p</i> =0.15)   | 1.02 [0.92 – 1.13]<br>( <i>p</i> =0.73)   |
|                                   |                       | +++                         | 3.17 [1.31 – 7.65]<br>( <i>p</i> =0.010)   |                                           |                                           |
| Anemia<br>2016                    | 453                   | mild                        | 1.07 [0.69 – 1.66]<br>( <i>p</i> =0.76)    |                                           | 0.99 [0.91 – 1.07]<br>( <i>p</i> =0.81)   |
|                                   |                       | moderate                    | 1.74 [1.08 – 2.80]<br>( <i>p</i> =0.024)   | 1.49 [1.03 – 2.16]<br>( <i>p</i> =0.036)  | 0.93 [0.85 – 1.01]<br>( <i>p</i> =0.071)  |
|                                   |                       | severe                      | 10.3 [2.40 – 44.1]<br>( <i>p</i> =0.0017)  |                                           | 0.63 [0.52 – 0.76]<br>( <i>p</i> <0.0001) |
| Anemia<br>2017                    | 269                   | mild, moderate<br>or severe | -                                          | 1.87 [1.16 – 3.03]<br>( <i>p</i> =0.010)  | 1.01 [0.89 – 1.16]<br>( <i>p</i> =0.83)   |
| Global score <sup>2</sup>         | 419                   | positive                    | 5.10 [2.21 – 11.8]<br>( <i>p</i> =0.00014) | 3.59 [2.03 – 6.37]<br>( <i>p</i> <0.0001) | 0.92 [0.80 – 1.06]<br>( <i>p</i> =0.27)   |
| Bladder<br>intermediate score     | 424                   | likely or<br>very likely    | 2.73 [1.32 – 5.62]<br>( <i>p</i> =0.0068)  | 2.32 [1.43 – 3.77]<br>( <i>p</i> =0.0065) | 0.91 [0.80 – 1.03]<br>( <i>p</i> =0.12)   |
| Upper tract<br>intermediate score | 419                   | positive                    | 3.30 [1.43 – 7.61]<br>( <i>p</i> =0.0050)  | 2.43 [1.24 – 4.80]<br>( <i>p</i> =0.010)  | 1.00 [0.85 – 1.18]<br>( <i>p</i> =0.96)   |
| Bladder wall<br>calcification     | 419                   | present                     | 7.04 [2.89 – 17.2]<br>( <i>p</i> <0.0001)  | 2.19 [1.18 – 4.04]<br>( <i>p</i> =0.012)  | 1.08 [0.93 – 1.25]<br>( <i>p</i> =0.31)   |
| Hepatomegaly                      | 137                   | Moderate<br>or severe       | 6.35 [2.30 – 17.5]<br>( <i>p</i> =0.00036) | 1.93 [0.91 – 4.09]<br>( <i>p</i> =0.088)  | 0.66 [0.54 – 0.81]<br>( <i>p</i> <0.0001) |

<sup>1</sup> Only individuals with complete data on each morbidity indicator, urogenital or intestinal infection intensities, age, sex, and study site were included in the cumulative link logistic regression models.

<sup>2</sup> The global score is the sum of the bladder and the upper tract intermediate scores.

**Table S12. Odds ratio [95% CI] and *p*-values (in parentheses) of various morbidity indicators being in category *j* or above in adults of Senegal in 2016 and 2017, depending on age, sex, and study site.**

| Morbidity indicator           | <i>n</i> <sup>1</sup> | <i>j</i>                    | Study site<br>(OR RT <i>vs</i> BK)      | Sex<br>(OR Men <i>vs</i> Women)          | Age<br>(OR per year)                    |
|-------------------------------|-----------------------|-----------------------------|-----------------------------------------|------------------------------------------|-----------------------------------------|
| Hematuria<br>2016             | 122                   | +, ++ or +++                | 2.36 [0.83 – 6.68]<br>( <i>p</i> =0.10) | 0.44 [0.20 – 0.94]<br>( <i>p</i> =0.037) | 1.02 [0.99 – 1.04]<br>( <i>p</i> =0.29) |
|                               |                       | +                           |                                         |                                          | 1.02 [0.99 – 1.05]<br>( <i>p</i> =0.21) |
| Hematuria<br>2017             | 157                   | ++                          | 1.27 [0.65 – 2.49]<br>( <i>p</i> =0.49) | 0.55 [0.28 – 1.08]<br>( <i>p</i> =0.081) | 0.99 [0.96 – 1.03]<br>( <i>p</i> =0.59) |
|                               |                       | +++                         |                                         |                                          | 0.97 [0.93 – 1.01]<br>( <i>p</i> =0.13) |
| Anemia<br>2016                | 42                    | mild, moderate<br>or severe | -                                       | 0.21 [0.03 – 0.98]<br>( <i>p</i> =0.071) | 0.99 [0.93 – 1.05]<br>( <i>p</i> =0.70) |
| Anemia<br>2017                | 41                    | mild, moderate<br>or severe | -                                       | 0.96 [0.26 – 3.62]<br>( <i>p</i> =0.95)  | 1.00 [0.94 – 1.07]<br>( <i>p</i> =0.89) |
| Global score <sup>2</sup>     | 58                    | positive                    | 1.27 [0.33 – 5.24]<br>( <i>p</i> =0.73) | 1.32 [0.39 – 4.59]<br>( <i>p</i> =0.66)  | 0.95 [0.90 – 1.01]<br>( <i>p</i> =0.10) |
| Bladder wall<br>calcification | 39                    | present                     | -                                       | 5.13 [0.63 – 75.3]<br>( <i>p</i> =0.17)  | 0.96 [0.87 – 1.05]<br>( <i>p</i> =0.42) |

<sup>1</sup> Only individuals with complete data on each morbidity indicator, urogenital or intestinal infection intensities, age, sex, and study site were included in the cumulative link logistic regression models.

<sup>2</sup> The global score is the sum of the bladder and the upper tract intermediate scores.

## REFERENCES

1. WHO Haemoglobin Concentrations for the Diagnosis of Anaemia and Assessment of Severity Available online: <http://www.who.int/vmnis/indicators/haemoglobin/en/> (accessed on 6 February 2020).
2. WHO *Ultrasound in Schistosomiasis: A Practical Guide to the Standard Use of Ultrasonography for Assessment of Schistosomiasis-Related Morbidity*; World Health Organization, UNDP/World Bank/WHO Special Programme for Research and Training in Tropical Diseases: Niamey, Niger, 1996; p. 55;.
3. Richter, J.; Domingues, A.L.D.; Barata, C.H.; Prata, A.R.; Lambertucci, J.R. Report of the Second Satellite Symposium on Ultrasound in Schistosomiasis. *Mem. Inst. Oswaldo Cruz* **2001**, *96*, 151–156, doi:10.1590/S0074-02762001000900023.
4. Christensen, R.H.B. *Ordinal - Regression Models for Ordinal Data*. R Package Version 2019.12-10; 2019;
5. Christensen, R.H.B. Cumulative Link Models for Ordinal Regression with the R Package Ordinal Available online: [https://cran.r-project.org/web/packages/ordinal/vignettes/clm\\_article.pdf](https://cran.r-project.org/web/packages/ordinal/vignettes/clm_article.pdf) (accessed on 3 June 2020).
